# Supplementary material for: Sea whip coral Leptogorgia virgulata in the Mid-Atlantic Bight: Colony complexity, age, and growth
Source: PeerJ. 2020 Feb 4;8:e8372. doi: 10.7717/peerj.8372 (PMC7006520; doi:10.7717/peerj.8372)
Supplement: Supplemental Information 1 [file peerj-08-8372-s001.xlsx]

## Sheet: USNM Numbers
Catalog number	Primary coll number	Taxon	Original count	Kind of Voucher	Event/Site	Preparation	Notes
1609121	10316SW1	Leptogorgia virgulata (Lamarck, 1815) : Gorgoniidae : Gorgonacea : Anthozoa : Cnidaria	1	Voucher	CES IRN 13036514 : : North Atlantic Ocean : : : : United States : Maryland : : : Memorial Barge, coast of Maryland : Centroid Latitude 38 17 27.54 N : Centroid Longitude 74 54 38.94 W : : Date coll. 03 Oct 2016 : : : : Depth 17 to 20 M : :	Dry	Age reader 1 (y): 7; Age reader 2 (y): 7
1609122	10316SW2	Leptogorgia virgulata (Lamarck, 1815) : Gorgoniidae : Gorgonacea : Anthozoa : Cnidaria	1	Voucher	CES IRN 13036514 : : North Atlantic Ocean : : : : United States : Maryland : : : Memorial Barge, coast of Maryland : Centroid Latitude 38 17 27.54 N : Centroid Longitude 74 54 38.94 W : : Date coll. 03 Oct 2016 : : : : Depth 17 to 20 M : :	Dry	Age reader 1 (y): 8; Age reader 2 (y): 8
1609123	10316SW3	Leptogorgia virgulata (Lamarck, 1815) : Gorgoniidae : Gorgonacea : Anthozoa : Cnidaria	1	Voucher	CES IRN 13036514 : : North Atlantic Ocean : : : : United States : Maryland : : : Memorial Barge, coast of Maryland : Centroid Latitude 38 17 27.54 N : Centroid Longitude 74 54 38.94 W : : Date coll. 03 Oct 2016 : : : : Depth 17 to 20 M : :	Dry	Age reader 1 (y): 8; Age reader 2 (y): 8
1609124	10316SW4	Leptogorgia virgulata (Lamarck, 1815) : Gorgoniidae : Gorgonacea : Anthozoa : Cnidaria	1	Voucher	CES IRN 13036514 : : North Atlantic Ocean : : : : United States : Maryland : : : Memorial Barge, coast of Maryland : Centroid Latitude 38 17 27.54 N : Centroid Longitude 74 54 38.94 W : : Date coll. 03 Oct 2016 : : : : Depth 17 to 20 M : :	Dry	Age reader 1 (y): 5; Age reader 2 (y): 5
1609125	10316SW5	Leptogorgia virgulata (Lamarck, 1815) : Gorgoniidae : Gorgonacea : Anthozoa : Cnidaria	1	Voucher	CES IRN 13036514 : : North Atlantic Ocean : : : : United States : Maryland : : : Memorial Barge, coast of Maryland : Centroid Latitude 38 17 27.54 N : Centroid Longitude 74 54 38.94 W : : Date coll. 03 Oct 2016 : : : : Depth 17 to 20 M : :	Dry	Age reader 1 (y): 9; Age reader 2 (y): 9
1609126	10316SW6	Leptogorgia virgulata (Lamarck, 1815) : Gorgoniidae : Gorgonacea : Anthozoa : Cnidaria	1	Voucher	CES IRN 13036514 : : North Atlantic Ocean : : : : United States : Maryland : : : Memorial Barge, coast of Maryland : Centroid Latitude 38 17 27.54 N : Centroid Longitude 74 54 38.94 W : : Date coll. 03 Oct 2016 : : : : Depth 17 to 20 M : :	Dry	Age reader 1 (y): 8; Age reader 2 (y): 8
1609127	10316SW7	Leptogorgia virgulata (Lamarck, 1815) : Gorgoniidae : Gorgonacea : Anthozoa : Cnidaria	1	Voucher	CES IRN 13036514 : : North Atlantic Ocean : : : : United States : Maryland : : : Memorial Barge, coast of Maryland : Centroid Latitude 38 17 27.54 N : Centroid Longitude 74 54 38.94 W : : Date coll. 03 Oct 2016 : : : : Depth 17 to 20 M : :	Dry	Age reader 1 (y): 7; Age reader 2 (y): 7
1609128	10316SW8	Leptogorgia virgulata (Lamarck, 1815) : Gorgoniidae : Gorgonacea : Anthozoa : Cnidaria	1	Voucher	CES IRN 13036514 : : North Atlantic Ocean : : : : United States : Maryland : : : Memorial Barge, coast of Maryland : Centroid Latitude 38 17 27.54 N : Centroid Longitude 74 54 38.94 W : : Date coll. 03 Oct 2016 : : : : Depth 17 to 20 M : :	Dry	Age reader 1 (y): 8; Age reader 2 (y): 8
1609129	10316SW9	Leptogorgia virgulata (Lamarck, 1815) : Gorgoniidae : Gorgonacea : Anthozoa : Cnidaria	1	Voucher	CES IRN 13036514 : : North Atlantic Ocean : : : : United States : Maryland : : : Memorial Barge, coast of Maryland : Centroid Latitude 38 17 27.54 N : Centroid Longitude 74 54 38.94 W : : Date coll. 03 Oct 2016 : : : : Depth 17 to 20 M : :	Dry	Age reader 1 (y): 8; Age reader 2 (y): 8
1609130	10316SW10	Leptogorgia virgulata (Lamarck, 1815) : Gorgoniidae : Gorgonacea : Anthozoa : Cnidaria	1	Voucher	CES IRN 13036514 : : North Atlantic Ocean : : : : United States : Maryland : : : Memorial Barge, coast of Maryland : Centroid Latitude 38 17 27.54 N : Centroid Longitude 74 54 38.94 W : : Date coll. 03 Oct 2016 : : : : Depth 17 to 20 M : :	Dry	Age reader 1 (y): 7; Age reader 2 (y): 7
1609131	10316SW11	Leptogorgia virgulata (Lamarck, 1815) : Gorgoniidae : Gorgonacea : Anthozoa : Cnidaria	1	Voucher	CES IRN 13036514 : : North Atlantic Ocean : : : : United States : Maryland : : : Memorial Barge, coast of Maryland : Centroid Latitude 38 17 27.54 N : Centroid Longitude 74 54 38.94 W : : Date coll. 03 Oct 2016 : : : : Depth 17 to 20 M : :	Dry	Age reader 1 (y): 9; Age reader 2 (y): 9
1609132	8717SW1	Leptogorgia virgulata (Lamarck, 1815) : Gorgoniidae : Gorgonacea : Anthozoa : Cnidaria	1	Voucher	CES IRN 13036515 : : North Atlantic Ocean : : : : United States : Maryland : : : Memorial Barge, coast of Maryland : Centroid Latitude 38 17 27.54 N : Centroid Longitude 74 54 38.94 W : : Date coll. 07 Aug 2017 : : : : Depth 17 to 20 M : :	Dry	Age reader 1 (y): 2; Age reader 2 (y): 2
1609133	8717SW2	Leptogorgia virgulata (Lamarck, 1815) : Gorgoniidae : Gorgonacea : Anthozoa : Cnidaria	1	Voucher	CES IRN 13036515 : : North Atlantic Ocean : : : : United States : Maryland : : : Memorial Barge, coast of Maryland : Centroid Latitude 38 17 27.54 N : Centroid Longitude 74 54 38.94 W : : Date coll. 07 Aug 2017 : : : : Depth 17 to 20 M : :	Dry	Age reader 1 (y): 3; Age reader 2 (y): 3
1609134	8717SW3	Leptogorgia virgulata (Lamarck, 1815) : Gorgoniidae : Gorgonacea : Anthozoa : Cnidaria	1	Voucher	CES IRN 13036515 : : North Atlantic Ocean : : : : United States : Maryland : : : Memorial Barge, coast of Maryland : Centroid Latitude 38 17 27.54 N : Centroid Longitude 74 54 38.94 W : : Date coll. 07 Aug 2017 : : : : Depth 17 to 20 M : :	Dry	Age reader 1 (y): 4; Age reader 2 (y): 4
1609135	8717SW4	Leptogorgia virgulata (Lamarck, 1815) : Gorgoniidae : Gorgonacea : Anthozoa : Cnidaria	1	Voucher	CES IRN 13036515 : : North Atlantic Ocean : : : : United States : Maryland : : : Memorial Barge, coast of Maryland : Centroid Latitude 38 17 27.54 N : Centroid Longitude 74 54 38.94 W : : Date coll. 07 Aug 2017 : : : : Depth 17 to 20 M : :	Dry	Age reader 1 (y): 4; Age reader 2 (y): 4
1609136	8717SW5	Leptogorgia virgulata (Lamarck, 1815) : Gorgoniidae : Gorgonacea : Anthozoa : Cnidaria	1	Voucher	CES IRN 13036515 : : North Atlantic Ocean : : : : United States : Maryland : : : Memorial Barge, coast of Maryland : Centroid Latitude 38 17 27.54 N : Centroid Longitude 74 54 38.94 W : : Date coll. 07 Aug 2017 : : : : Depth 17 to 20 M : :	Dry	Age reader 1 (y): 4; Age reader 2 (y): 4
1609137	8717SW6	Leptogorgia virgulata (Lamarck, 1815) : Gorgoniidae : Gorgonacea : Anthozoa : Cnidaria	1	Voucher	CES IRN 13036515 : : North Atlantic Ocean : : : : United States : Maryland : : : Memorial Barge, coast of Maryland : Centroid Latitude 38 17 27.54 N : Centroid Longitude 74 54 38.94 W : : Date coll. 07 Aug 2017 : : : : Depth 17 to 20 M : :	Dry	Age reader 1 (y): 7; Age reader 2 (y): 8
1609138	8717SW7	Leptogorgia virgulata (Lamarck, 1815) : Gorgoniidae : Gorgonacea : Anthozoa : Cnidaria	1	Voucher	CES IRN 13036515 : : North Atlantic Ocean : : : : United States : Maryland : : : Memorial Barge, coast of Maryland : Centroid Latitude 38 17 27.54 N : Centroid Longitude 74 54 38.94 W : : Date coll. 07 Aug 2017 : : : : Depth 17 to 20 M : :	Dry	Age reader 1 (y): 6; Age reader 2 (y): 5
1609139	8717SW8	Leptogorgia virgulata (Lamarck, 1815) : Gorgoniidae : Gorgonacea : Anthozoa : Cnidaria	1	Voucher	CES IRN 13036515 : : North Atlantic Ocean : : : : United States : Maryland : : : Memorial Barge, coast of Maryland : Centroid Latitude 38 17 27.54 N : Centroid Longitude 74 54 38.94 W : : Date coll. 07 Aug 2017 : : : : Depth 17 to 20 M : :	Dry	Age reader 1 (y): 6; Age reader 2 (y): 5
1609140	8717SW9	Leptogorgia virgulata (Lamarck, 1815) : Gorgoniidae : Gorgonacea : Anthozoa : Cnidaria	1	Voucher	CES IRN 13036515 : : North Atlantic Ocean : : : : United States : Maryland : : : Memorial Barge, coast of Maryland : Centroid Latitude 38 17 27.54 N : Centroid Longitude 74 54 38.94 W : : Date coll. 07 Aug 2017 : : : : Depth 17 to 20 M : :	Dry	Age reader 1 (y): 6; Age reader 2 (y): 6
1609141	8717SW10	Leptogorgia virgulata (Lamarck, 1815) : Gorgoniidae : Gorgonacea : Anthozoa : Cnidaria	1	Voucher	CES IRN 13036515 : : North Atlantic Ocean : : : : United States : Maryland : : : Memorial Barge, coast of Maryland : Centroid Latitude 38 17 27.54 N : Centroid Longitude 74 54 38.94 W : : Date coll. 07 Aug 2017 : : : : Depth 17 to 20 M : :	Dry	Age reader 1 (y): 8; Age reader 2 (y): 8
1609142	8717SW11	Leptogorgia virgulata (Lamarck, 1815) : Gorgoniidae : Gorgonacea : Anthozoa : Cnidaria	1	Voucher	CES IRN 13036515 : : North Atlantic Ocean : : : : United States : Maryland : : : Memorial Barge, coast of Maryland : Centroid Latitude 38 17 27.54 N : Centroid Longitude 74 54 38.94 W : : Date coll. 07 Aug 2017 : : : : Depth 17 to 20 M : :	Dry	Age reader 1 (y): 8; Age reader 2 (y): 8
1609143	8717SW12	Leptogorgia virgulata (Lamarck, 1815) : Gorgoniidae : Gorgonacea : Anthozoa : Cnidaria	1	Voucher	CES IRN 13036515 : : North Atlantic Ocean : : : : United States : Maryland : : : Memorial Barge, coast of Maryland : Centroid Latitude 38 17 27.54 N : Centroid Longitude 74 54 38.94 W : : Date coll. 07 Aug 2017 : : : : Depth 17 to 20 M : :	Dry	Age reader 1 (y): 6; Age reader 2 (y): 6
1609144	8717SW13	Leptogorgia virgulata (Lamarck, 1815) : Gorgoniidae : Gorgonacea : Anthozoa : Cnidaria	1	Voucher	CES IRN 13036515 : : North Atlantic Ocean : : : : United States : Maryland : : : Memorial Barge, coast of Maryland : Centroid Latitude 38 17 27.54 N : Centroid Longitude 74 54 38.94 W : : Date coll. 07 Aug 2017 : : : : Depth 17 to 20 M : :	Dry	Age reader 1 (y): 6; Age reader 2 (y): 6
1609145	81117SW1	Leptogorgia virgulata (Lamarck, 1815) : Gorgoniidae : Gorgonacea : Anthozoa : Cnidaria	1	Voucher	CES IRN 13036516 : : North Atlantic Ocean : : : : United States : Maryland : : : South Ledges, coast of Maryland : Centroid Latitude 38 9 4 N : Centroid Longitude 74 56 48 W : : Date coll. 11 Aug 2017 : : : : Depth 17 to 21 M : :	Dry	Age reader 1 (y): 5; Age reader 2 (y): 5
1609146	81117SW2	Leptogorgia virgulata (Lamarck, 1815) : Gorgoniidae : Gorgonacea : Anthozoa : Cnidaria	1	Voucher	CES IRN 13036516 : : North Atlantic Ocean : : : : United States : Maryland : : : South Ledges, coast of Maryland : Centroid Latitude 38 9 4 N : Centroid Longitude 74 56 48 W : : Date coll. 11 Aug 2017 : : : : Depth 17 to 21 M : :	Dry	Age reader 1 (y): 7; Age reader 2 (y): 6
1609147	81117SW3	Leptogorgia virgulata (Lamarck, 1815) : Gorgoniidae : Gorgonacea : Anthozoa : Cnidaria	1	Voucher	CES IRN 13036516 : : North Atlantic Ocean : : : : United States : Maryland : : : South Ledges, coast of Maryland : Centroid Latitude 38 9 4 N : Centroid Longitude 74 56 48 W : : Date coll. 11 Aug 2017 : : : : Depth 17 to 21 M : :	Dry	Age reader 1 (y): 4; Age reader 2 (y): 4
1609148	81117SW4	Leptogorgia virgulata (Lamarck, 1815) : Gorgoniidae : Gorgonacea : Anthozoa : Cnidaria	1	Voucher	CES IRN 13036516 : : North Atlantic Ocean : : : : United States : Maryland : : : South Ledges, coast of Maryland : Centroid Latitude 38 9 4 N : Centroid Longitude 74 56 48 W : : Date coll. 11 Aug 2017 : : : : Depth 17 to 21 M : :	Dry	Age reader 1 (y): 8; Age reader 2 (y): 8
1609149	81117SW5	Leptogorgia virgulata (Lamarck, 1815) : Gorgoniidae : Gorgonacea : Anthozoa : Cnidaria	1	Voucher	CES IRN 13036516 : : North Atlantic Ocean : : : : United States : Maryland : : : South Ledges, coast of Maryland : Centroid Latitude 38 9 4 N : Centroid Longitude 74 56 48 W : : Date coll. 11 Aug 2017 : : : : Depth 17 to 21 M : :	Dry	Age reader 1 (y): 7; Age reader 2 (y): 7
1609150	81117SW6	Leptogorgia virgulata (Lamarck, 1815) : Gorgoniidae : Gorgonacea : Anthozoa : Cnidaria	1	Voucher	CES IRN 13036516 : : North Atlantic Ocean : : : : United States : Maryland : : : South Ledges, coast of Maryland : Centroid Latitude 38 9 4 N : Centroid Longitude 74 56 48 W : : Date coll. 11 Aug 2017 : : : : Depth 17 to 21 M : :	Dry	Age reader 1 (y): 8; Age reader 2 (y): 8
1609151	81117SW7	Leptogorgia virgulata (Lamarck, 1815) : Gorgoniidae : Gorgonacea : Anthozoa : Cnidaria	1	Voucher	CES IRN 13036516 : : North Atlantic Ocean : : : : United States : Maryland : : : South Ledges, coast of Maryland : Centroid Latitude 38 9 4 N : Centroid Longitude 74 56 48 W : : Date coll. 11 Aug 2017 : : : : Depth 17 to 21 M : :	Dry	Age reader 1 (y): 5; Age reader 2 (y): 5
1609152	81117SW8	Leptogorgia virgulata (Lamarck, 1815) : Gorgoniidae : Gorgonacea : Anthozoa : Cnidaria	1	Voucher	CES IRN 13036516 : : North Atlantic Ocean : : : : United States : Maryland : : : South Ledges, coast of Maryland : Centroid Latitude 38 9 4 N : Centroid Longitude 74 56 48 W : : Date coll. 11 Aug 2017 : : : : Depth 17 to 21 M : :	Dry	Age reader 1 (y): 7; Age reader 2 (y): 6
1609153	81117SW9	Leptogorgia virgulata (Lamarck, 1815) : Gorgoniidae : Gorgonacea : Anthozoa : Cnidaria	1	Voucher	CES IRN 13036516 : : North Atlantic Ocean : : : : United States : Maryland : : : South Ledges, coast of Maryland : Centroid Latitude 38 9 4 N : Centroid Longitude 74 56 48 W : : Date coll. 11 Aug 2017 : : : : Depth 17 to 21 M : :	Dry	Age reader 1 (y): 11; Age reader 2 (y): 11
1609154	81117SW10	Leptogorgia virgulata (Lamarck, 1815) : Gorgoniidae : Gorgonacea : Anthozoa : Cnidaria	1	Voucher	CES IRN 13036516 : : North Atlantic Ocean : : : : United States : Maryland : : : South Ledges, coast of Maryland : Centroid Latitude 38 9 4 N : Centroid Longitude 74 56 48 W : : Date coll. 11 Aug 2017 : : : : Depth 17 to 21 M : :	Dry	Age reader 1 (y): 9; Age reader 2 (y): 9
1609155	81117SW11	Leptogorgia virgulata (Lamarck, 1815) : Gorgoniidae : Gorgonacea : Anthozoa : Cnidaria	1	Voucher	CES IRN 13036516 : : North Atlantic Ocean : : : : United States : Maryland : : : South Ledges, coast of Maryland : Centroid Latitude 38 9 4 N : Centroid Longitude 74 56 48 W : : Date coll. 11 Aug 2017 : : : : Depth 17 to 21 M : :	Dry	Age reader 1 (y): 7; Age reader 2 (y): 7
1609156	81117SW12	Leptogorgia virgulata (Lamarck, 1815) : Gorgoniidae : Gorgonacea : Anthozoa : Cnidaria	1	Voucher	CES IRN 13036516 : : North Atlantic Ocean : : : : United States : Maryland : : : South Ledges, coast of Maryland : Centroid Latitude 38 9 4 N : Centroid Longitude 74 56 48 W : : Date coll. 11 Aug 2017 : : : : Depth 17 to 21 M : :	Dry	Age reader 1 (y): 5; Age reader 2 (y): 5
1609157	81117SW13	Leptogorgia virgulata (Lamarck, 1815) : Gorgoniidae : Gorgonacea : Anthozoa : Cnidaria	1	Voucher	CES IRN 13036516 : : North Atlantic Ocean : : : : United States : Maryland : : : South Ledges, coast of Maryland : Centroid Latitude 38 9 4 N : Centroid Longitude 74 56 48 W : : Date coll. 11 Aug 2017 : : : : Depth 17 to 21 M : :	Dry	Age reader 1 (y): 7; Age reader 2 (y): 8
1609158	81117SW14	Leptogorgia virgulata (Lamarck, 1815) : Gorgoniidae : Gorgonacea : Anthozoa : Cnidaria	1	Voucher	CES IRN 13036516 : : North Atlantic Ocean : : : : United States : Maryland : : : South Ledges, coast of Maryland : Centroid Latitude 38 9 4 N : Centroid Longitude 74 56 48 W : : Date coll. 11 Aug 2017 : : : : Depth 17 to 21 M : :	Dry	Age reader 1 (y): 8; Age reader 2 (y): 8
1609159	81117SW15	Leptogorgia virgulata (Lamarck, 1815) : Gorgoniidae : Gorgonacea : Anthozoa : Cnidaria	1	Voucher	CES IRN 13036516 : : North Atlantic Ocean : : : : United States : Maryland : : : South Ledges, coast of Maryland : Centroid Latitude 38 9 4 N : Centroid Longitude 74 56 48 W : : Date coll. 11 Aug 2017 : : : : Depth 17 to 21 M : :	Dry	Age reader 1 (y): 8; Age reader 2 (y): 8
1609160	81117SW16	Leptogorgia virgulata (Lamarck, 1815) : Gorgoniidae : Gorgonacea : Anthozoa : Cnidaria	1	Voucher	CES IRN 13036516 : : North Atlantic Ocean : : : : United States : Maryland : : : South Ledges, coast of Maryland : Centroid Latitude 38 9 4 N : Centroid Longitude 74 56 48 W : : Date coll. 11 Aug 2017 : : : : Depth 17 to 21 M : :	Dry	Age reader 1 (y): 12; Age reader 2 (y): 11
1609161	81117SW17	Leptogorgia virgulata (Lamarck, 1815) : Gorgoniidae : Gorgonacea : Anthozoa : Cnidaria	1	Voucher	CES IRN 13036516 : : North Atlantic Ocean : : : : United States : Maryland : : : South Ledges, coast of Maryland : Centroid Latitude 38 9 4 N : Centroid Longitude 74 56 48 W : : Date coll. 11 Aug 2017 : : : : Depth 17 to 21 M : :	Dry	Age reader 1 (y): 10; Age reader 2 (y): 10
1609162	81117SW18	Leptogorgia virgulata (Lamarck, 1815) : Gorgoniidae : Gorgonacea : Anthozoa : Cnidaria	1	Voucher	CES IRN 13036516 : : North Atlantic Ocean : : : : United States : Maryland : : : South Ledges, coast of Maryland : Centroid Latitude 38 9 4 N : Centroid Longitude 74 56 48 W : : Date coll. 11 Aug 2017 : : : : Depth 17 to 21 M : :	Dry	Age reader 1 (y): 9; Age reader 2 (y): 9
1609163	81117SW19	Leptogorgia virgulata (Lamarck, 1815) : Gorgoniidae : Gorgonacea : Anthozoa : Cnidaria	1	Voucher	CES IRN 13036516 : : North Atlantic Ocean : : : : United States : Maryland : : : South Ledges, coast of Maryland : Centroid Latitude 38 9 4 N : Centroid Longitude 74 56 48 W : : Date coll. 11 Aug 2017 : : : : Depth 17 to 21 M : :	Dry	Age reader 1 (y): 9; Age reader 2 (y): 9
1609164	81117SW20	Leptogorgia virgulata (Lamarck, 1815) : Gorgoniidae : Gorgonacea : Anthozoa : Cnidaria	1	Voucher	CES IRN 13036516 : : North Atlantic Ocean : : : : United States : Maryland : : : South Ledges, coast of Maryland : Centroid Latitude 38 9 4 N : Centroid Longitude 74 56 48 W : : Date coll. 11 Aug 2017 : : : : Depth 17 to 21 M : :	Dry	Age reader 1 (y): 13; Age reader 2 (y): 13
1609165	81117SW21	Leptogorgia virgulata (Lamarck, 1815) : Gorgoniidae : Gorgonacea : Anthozoa : Cnidaria	1	Voucher	CES IRN 13036516 : : North Atlantic Ocean : : : : United States : Maryland : : : South Ledges, coast of Maryland : Centroid Latitude 38 9 4 N : Centroid Longitude 74 56 48 W : : Date coll. 11 Aug 2017 : : : : Depth 17 to 21 M : :	Dry	Age reader 1 (y): 13; Age reader 2 (y): 13
1609166	81117SW22	Leptogorgia virgulata (Lamarck, 1815) : Gorgoniidae : Gorgonacea : Anthozoa : Cnidaria	1	Voucher	CES IRN 13036516 : : North Atlantic Ocean : : : : United States : Maryland : : : South Ledges, coast of Maryland : Centroid Latitude 38 9 4 N : Centroid Longitude 74 56 48 W : : Date coll. 11 Aug 2017 : : : : Depth 17 to 21 M : :	Dry	Age reader 1 (y): 6; Age reader 2 (y): 6
1609167	81117SW23	Leptogorgia virgulata (Lamarck, 1815) : Gorgoniidae : Gorgonacea : Anthozoa : Cnidaria	1	Voucher	CES IRN 13036516 : : North Atlantic Ocean : : : : United States : Maryland : : : South Ledges, coast of Maryland : Centroid Latitude 38 9 4 N : Centroid Longitude 74 56 48 W : : Date coll. 11 Aug 2017 : : : : Depth 17 to 21 M : :	Dry	Age reader 1 (y): 14; Age reader 2 (y): 14
1609168	81117SW24	Leptogorgia virgulata (Lamarck, 1815) : Gorgoniidae : Gorgonacea : Anthozoa : Cnidaria	2	Voucher	CES IRN 13036516 : : North Atlantic Ocean : : : : United States : Maryland : : : South Ledges, coast of Maryland : Centroid Latitude 38 9 4 N : Centroid Longitude 74 56 48 W : : Date coll. 11 Aug 2017 : : : : Depth 17 to 21 M : :	Dry	Age reader 1 (y): 10; Age reader 2 (y): 9
1609169	81117SW26	Leptogorgia virgulata (Lamarck, 1815) : Gorgoniidae : Gorgonacea : Anthozoa : Cnidaria	1	Voucher	CES IRN 13036516 : : North Atlantic Ocean : : : : United States : Maryland : : : South Ledges, coast of Maryland : Centroid Latitude 38 9 4 N : Centroid Longitude 74 56 48 W : : Date coll. 11 Aug 2017 : : : : Depth 17 to 21 M : :	Dry	Age reader 1 (y): 15; Age reader 2 (y): 15
1609170	81018SW1	Leptogorgia virgulata (Lamarck, 1815) : Gorgoniidae : Gorgonacea : Anthozoa : Cnidaria	1	Voucher	CES IRN 13036517 : : North Atlantic Ocean : : : : United States : Maryland : : : Sussex Wreck, coast of Maryland : Centroid Latitude 38 9 32 N : Centroid Longitude 74 56 38.6 W : : Date coll. 10 Aug 2018 : : : : Depth 24 to 26 M : :	Dry	Age reader 1 (y): 7; Age reader 2 (y): 7
1609171	81018SW2	Leptogorgia virgulata (Lamarck, 1815) : Gorgoniidae : Gorgonacea : Anthozoa : Cnidaria	1	Voucher	CES IRN 13036517 : : North Atlantic Ocean : : : : United States : Maryland : : : Sussex Wreck, coast of Maryland : Centroid Latitude 38 9 32 N : Centroid Longitude 74 56 38.6 W : : Date coll. 10 Aug 2018 : : : : Depth 24 to 26 M : :	Dry	Age reader 1 (y): 6; Age reader 2 (y): 7
1609172	81018SW3	Leptogorgia virgulata (Lamarck, 1815) : Gorgoniidae : Gorgonacea : Anthozoa : Cnidaria	1	Voucher	CES IRN 13036517 : : North Atlantic Ocean : : : : United States : Maryland : : : Sussex Wreck, coast of Maryland : Centroid Latitude 38 9 32 N : Centroid Longitude 74 56 38.6 W : : Date coll. 10 Aug 2018 : : : : Depth 24 to 26 M : :	Dry	Age reader 1 (y): 7; Age reader 2 (y): 7
1609173	81018SW4	Leptogorgia virgulata (Lamarck, 1815) : Gorgoniidae : Gorgonacea : Anthozoa : Cnidaria	1	Voucher	CES IRN 13036517 : : North Atlantic Ocean : : : : United States : Maryland : : : Sussex Wreck, coast of Maryland : Centroid Latitude 38 9 32 N : Centroid Longitude 74 56 38.6 W : : Date coll. 10 Aug 2018 : : : : Depth 24 to 26 M : :	Dry	Age reader 1 (y): 5; Age reader 2 (y): 5
1609174	81018SW5	Leptogorgia virgulata (Lamarck, 1815) : Gorgoniidae : Gorgonacea : Anthozoa : Cnidaria	1	Voucher	CES IRN 13036517 : : North Atlantic Ocean : : : : United States : Maryland : : : Sussex Wreck, coast of Maryland : Centroid Latitude 38 9 32 N : Centroid Longitude 74 56 38.6 W : : Date coll. 10 Aug 2018 : : : : Depth 24 to 26 M : :	Dry	Age reader 1 (y): 6; Age reader 2 (y): 6
1609175	81018SW6	Leptogorgia virgulata (Lamarck, 1815) : Gorgoniidae : Gorgonacea : Anthozoa : Cnidaria	1	Voucher	CES IRN 13036517 : : North Atlantic Ocean : : : : United States : Maryland : : : Sussex Wreck, coast of Maryland : Centroid Latitude 38 9 32 N : Centroid Longitude 74 56 38.6 W : : Date coll. 10 Aug 2018 : : : : Depth 24 to 26 M : :	Dry	Age reader 1 (y): 7; Age reader 2 (y): 6
1609176	81018SW7	Leptogorgia virgulata (Lamarck, 1815) : Gorgoniidae : Gorgonacea : Anthozoa : Cnidaria	1	Voucher	CES IRN 13036517 : : North Atlantic Ocean : : : : United States : Maryland : : : Sussex Wreck, coast of Maryland : Centroid Latitude 38 9 32 N : Centroid Longitude 74 56 38.6 W : : Date coll. 10 Aug 2018 : : : : Depth 24 to 26 M : :	Dry	Age reader 1 (y): 7; Age reader 2 (y): 7
1609177	81018SW8	Leptogorgia virgulata (Lamarck, 1815) : Gorgoniidae : Gorgonacea : Anthozoa : Cnidaria	1	Voucher	CES IRN 13036517 : : North Atlantic Ocean : : : : United States : Maryland : : : Sussex Wreck, coast of Maryland : Centroid Latitude 38 9 32 N : Centroid Longitude 74 56 38.6 W : : Date coll. 10 Aug 2018 : : : : Depth 24 to 26 M : :	Dry	Age reader 1 (y): 7; Age reader 2 (y): 7
1609178	81018SW9	Leptogorgia virgulata (Lamarck, 1815) : Gorgoniidae : Gorgonacea : Anthozoa : Cnidaria	1	Voucher	CES IRN 13036517 : : North Atlantic Ocean : : : : United States : Maryland : : : Sussex Wreck, coast of Maryland : Centroid Latitude 38 9 32 N : Centroid Longitude 74 56 38.6 W : : Date coll. 10 Aug 2018 : : : : Depth 24 to 26 M : :	Dry	Age reader 1 (y): 10; Age reader 2 (y): 10
1609179	81018SW10	Leptogorgia virgulata (Lamarck, 1815) : Gorgoniidae : Gorgonacea : Anthozoa : Cnidaria	1	Voucher	CES IRN 13036517 : : North Atlantic Ocean : : : : United States : Maryland : : : Sussex Wreck, coast of Maryland : Centroid Latitude 38 9 32 N : Centroid Longitude 74 56 38.6 W : : Date coll. 10 Aug 2018 : : : : Depth 24 to 26 M : :	Dry	Age reader 1 (y): 7; Age reader 2 (y): 7
1609180	81018SW11	Leptogorgia virgulata (Lamarck, 1815) : Gorgoniidae : Gorgonacea : Anthozoa : Cnidaria	1	Voucher	CES IRN 13036517 : : North Atlantic Ocean : : : : United States : Maryland : : : Sussex Wreck, coast of Maryland : Centroid Latitude 38 9 32 N : Centroid Longitude 74 56 38.6 W : : Date coll. 10 Aug 2018 : : : : Depth 24 to 26 M : :	Dry	Age reader 1 (y): 7; Age reader 2 (y): 7
1609181	81018SW12	Leptogorgia virgulata (Lamarck, 1815) : Gorgoniidae : Gorgonacea : Anthozoa : Cnidaria	1	Voucher	CES IRN 13036517 : : North Atlantic Ocean : : : : United States : Maryland : : : Sussex Wreck, coast of Maryland : Centroid Latitude 38 9 32 N : Centroid Longitude 74 56 38.6 W : : Date coll. 10 Aug 2018 : : : : Depth 24 to 26 M : :	Dry	Age reader 1 (y): 7; Age reader 2 (y): 7
1609182	81018SW13	Leptogorgia virgulata (Lamarck, 1815) : Gorgoniidae : Gorgonacea : Anthozoa : Cnidaria	1	Voucher	CES IRN 13036517 : : North Atlantic Ocean : : : : United States : Maryland : : : Sussex Wreck, coast of Maryland : Centroid Latitude 38 9 32 N : Centroid Longitude 74 56 38.6 W : : Date coll. 10 Aug 2018 : : : : Depth 24 to 26 M : :	Dry	Age reader 1 (y): 6; Age reader 2 (y): 6
1609183	81018SW14	Leptogorgia virgulata (Lamarck, 1815) : Gorgoniidae : Gorgonacea : Anthozoa : Cnidaria	1	Voucher	CES IRN 13036517 : : North Atlantic Ocean : : : : United States : Maryland : : : Sussex Wreck, coast of Maryland : Centroid Latitude 38 9 32 N : Centroid Longitude 74 56 38.6 W : : Date coll. 10 Aug 2018 : : : : Depth 24 to 26 M : :	Dry	Age reader 1 (y): 8; Age reader 2 (y): 7
1609184	81018SW15	Leptogorgia virgulata (Lamarck, 1815) : Gorgoniidae : Gorgonacea : Anthozoa : Cnidaria	1	Voucher	CES IRN 13036517 : : North Atlantic Ocean : : : : United States : Maryland : : : Sussex Wreck, coast of Maryland : Centroid Latitude 38 9 32 N : Centroid Longitude 74 56 38.6 W : : Date coll. 10 Aug 2018 : : : : Depth 24 to 26 M : :	Dry	Age reader 1 (y): 8; Age reader 2 (y): 8
1609185	81018SW16	Leptogorgia virgulata (Lamarck, 1815) : Gorgoniidae : Gorgonacea : Anthozoa : Cnidaria	1	Voucher	CES IRN 13036517 : : North Atlantic Ocean : : : : United States : Maryland : : : Sussex Wreck, coast of Maryland : Centroid Latitude 38 9 32 N : Centroid Longitude 74 56 38.6 W : : Date coll. 10 Aug 2018 : : : : Depth 24 to 26 M : :	Dry	Age reader 1 (y): 6; Age reader 2 (y): 6
1609186	81018SW17	Leptogorgia virgulata (Lamarck, 1815) : Gorgoniidae : Gorgonacea : Anthozoa : Cnidaria	1	Voucher	CES IRN 13036517 : : North Atlantic Ocean : : : : United States : Maryland : : : Sussex Wreck, coast of Maryland : Centroid Latitude 38 9 32 N : Centroid Longitude 74 56 38.6 W : : Date coll. 10 Aug 2018 : : : : Depth 24 to 26 M : :	Dry	Age reader 1 (y): 7; Age reader 2 (y): 7
1609187	81018SW18	Leptogorgia virgulata (Lamarck, 1815) : Gorgoniidae : Gorgonacea : Anthozoa : Cnidaria	1	Voucher	CES IRN 13036517 : : North Atlantic Ocean : : : : United States : Maryland : : : Sussex Wreck, coast of Maryland : Centroid Latitude 38 9 32 N : Centroid Longitude 74 56 38.6 W : : Date coll. 10 Aug 2018 : : : : Depth 24 to 26 M : :	Dry	Age reader 1 (y): 6; Age reader 2 (y): 6
1609188	81018SW19	Leptogorgia virgulata (Lamarck, 1815) : Gorgoniidae : Gorgonacea : Anthozoa : Cnidaria	1	Voucher	CES IRN 13036517 : : North Atlantic Ocean : : : : United States : Maryland : : : Sussex Wreck, coast of Maryland : Centroid Latitude 38 9 32 N : Centroid Longitude 74 56 38.6 W : : Date coll. 10 Aug 2018 : : : : Depth 24 to 26 M : :	Dry	Age reader 1 (y): 13; Age reader 2 (y): 12
1609189	81018SW20	Leptogorgia virgulata (Lamarck, 1815) : Gorgoniidae : Gorgonacea : Anthozoa : Cnidaria	1	Voucher	CES IRN 13036517 : : North Atlantic Ocean : : : : United States : Maryland : : : Sussex Wreck, coast of Maryland : Centroid Latitude 38 9 32 N : Centroid Longitude 74 56 38.6 W : : Date coll. 10 Aug 2018 : : : : Depth 24 to 26 M : :	Dry	Age reader 1 (y): 6; Age reader 2 (y): 6
1609190	81018SW21	Leptogorgia virgulata (Lamarck, 1815) : Gorgoniidae : Gorgonacea : Anthozoa : Cnidaria	1	Voucher	CES IRN 13036517 : : North Atlantic Ocean : : : : United States : Maryland : : : Sussex Wreck, coast of Maryland : Centroid Latitude 38 9 32 N : Centroid Longitude 74 56 38.6 W : : Date coll. 10 Aug 2018 : : : : Depth 24 to 26 M : :	Dry	Age reader 1 (y): 9; Age reader 2 (y): 10
1609191	81018SW22	Leptogorgia virgulata (Lamarck, 1815) : Gorgoniidae : Gorgonacea : Anthozoa : Cnidaria	1	Voucher	CES IRN 13036517 : : North Atlantic Ocean : : : : United States : Maryland : : : Sussex Wreck, coast of Maryland : Centroid Latitude 38 9 32 N : Centroid Longitude 74 56 38.6 W : : Date coll. 10 Aug 2018 : : : : Depth 24 to 26 M : :	Dry	Age reader 1 (y): 8; Age reader 2 (y): 9
1609192	81018SW23	Leptogorgia virgulata (Lamarck, 1815) : Gorgoniidae : Gorgonacea : Anthozoa : Cnidaria	1	Voucher	CES IRN 13036517 : : North Atlantic Ocean : : : : United States : Maryland : : : Sussex Wreck, coast of Maryland : Centroid Latitude 38 9 32 N : Centroid Longitude 74 56 38.6 W : : Date coll. 10 Aug 2018 : : : : Depth 24 to 26 M : :	Dry	Age reader 1 (y): 5; Age reader 2 (y): 5
1609193	81018SW25	Leptogorgia virgulata (Lamarck, 1815) : Gorgoniidae : Gorgonacea : Anthozoa : Cnidaria	1	Voucher	CES IRN 13036517 : : North Atlantic Ocean : : : : United States : Maryland : : : Sussex Wreck, coast of Maryland : Centroid Latitude 38 9 32 N : Centroid Longitude 74 56 38.6 W : : Date coll. 10 Aug 2018 : : : : Depth 24 to 26 M : :	Dry	Age reader 1 (y): 7; Age reader 2 (y): 7
1609194	81018SW26	Leptogorgia virgulata (Lamarck, 1815) : Gorgoniidae : Gorgonacea : Anthozoa : Cnidaria	1	Voucher	CES IRN 13036517 : : North Atlantic Ocean : : : : United States : Maryland : : : Sussex Wreck, coast of Maryland : Centroid Latitude 38 9 32 N : Centroid Longitude 74 56 38.6 W : : Date coll. 10 Aug 2018 : : : : Depth 24 to 26 M : :	Dry	Age reader 1 (y): 8; Age reader 2 (y): 8
1609195	81018SW27	Leptogorgia virgulata (Lamarck, 1815) : Gorgoniidae : Gorgonacea : Anthozoa : Cnidaria	1	Voucher	CES IRN 13036517 : : North Atlantic Ocean : : : : United States : Maryland : : : Sussex Wreck, coast of Maryland : Centroid Latitude 38 9 32 N : Centroid Longitude 74 56 38.6 W : : Date coll. 10 Aug 2018 : : : : Depth 24 to 26 M : :	Dry	Age reader 1 (y): 6; Age reader 2 (y): 6
1609196	81018SW28	Leptogorgia virgulata (Lamarck, 1815) : Gorgoniidae : Gorgonacea : Anthozoa : Cnidaria	1	Voucher	CES IRN 13036517 : : North Atlantic Ocean : : : : United States : Maryland : : : Sussex Wreck, coast of Maryland : Centroid Latitude 38 9 32 N : Centroid Longitude 74 56 38.6 W : : Date coll. 10 Aug 2018 : : : : Depth 24 to 26 M : :	Dry	Age reader 1 (y): 9; Age reader 2 (y): 9
1609197	81018SW29	Leptogorgia virgulata (Lamarck, 1815) : Gorgoniidae : Gorgonacea : Anthozoa : Cnidaria	1	Voucher	CES IRN 13036517 : : North Atlantic Ocean : : : : United States : Maryland : : : Sussex Wreck, coast of Maryland : Centroid Latitude 38 9 32 N : Centroid Longitude 74 56 38.6 W : : Date coll. 10 Aug 2018 : : : : Depth 24 to 26 M : :	Dry	Age reader 1 (y): 7; Age reader 2 (y): 7
1609198	10118SW1	Leptogorgia virgulata (Lamarck, 1815) : Gorgoniidae : Gorgonacea : Anthozoa : Cnidaria	1	Voucher	CES IRN 13036518 : : North Atlantic Ocean : : : : United States : Maryland : : : Boom Wreck, coast of Maryland : Centroid Latitude 38 8 26.0 N : Centroid Longitude 74 57 42.36 W : : Date coll. 01 Oct 2018 : : : : Depth 21 to 24 M : :	Dry	Age reader 1 (y): 6; Age reader 2 (y): 6
1609199	10118SW2	Leptogorgia virgulata (Lamarck, 1815) : Gorgoniidae : Gorgonacea : Anthozoa : Cnidaria	1	Voucher	CES IRN 13036518 : : North Atlantic Ocean : : : : United States : Maryland : : : Boom Wreck, coast of Maryland : Centroid Latitude 38 8 26.0 N : Centroid Longitude 74 57 42.36 W : : Date coll. 01 Oct 2018 : : : : Depth 21 to 24 M : :	Dry	Age reader 1 (y): 7; Age reader 2 (y): 7
1609200	10118SW3	Leptogorgia virgulata (Lamarck, 1815) : Gorgoniidae : Gorgonacea : Anthozoa : Cnidaria	1	Voucher	CES IRN 13036518 : : North Atlantic Ocean : : : : United States : Maryland : : : Boom Wreck, coast of Maryland : Centroid Latitude 38 8 26.0 N : Centroid Longitude 74 57 42.36 W : : Date coll. 01 Oct 2018 : : : : Depth 21 to 24 M : :	Dry	Age reader 1 (y): 7; Age reader 2 (y): 7
1609201	10118SW4	Leptogorgia virgulata (Lamarck, 1815) : Gorgoniidae : Gorgonacea : Anthozoa : Cnidaria	1	Voucher	CES IRN 13036518 : : North Atlantic Ocean : : : : United States : Maryland : : : Boom Wreck, coast of Maryland : Centroid Latitude 38 8 26.0 N : Centroid Longitude 74 57 42.36 W : : Date coll. 01 Oct 2018 : : : : Depth 21 to 24 M : :	Dry	Age reader 1 (y): 7; Age reader 2 (y): 8
1609202	10118SW5	Leptogorgia virgulata (Lamarck, 1815) : Gorgoniidae : Gorgonacea : Anthozoa : Cnidaria	1	Voucher	CES IRN 13036518 : : North Atlantic Ocean : : : : United States : Maryland : : : Boom Wreck, coast of Maryland : Centroid Latitude 38 8 26.0 N : Centroid Longitude 74 57 42.36 W : : Date coll. 01 Oct 2018 : : : : Depth 21 to 24 M : :	Dry	Age reader 1 (y): 8; Age reader 2 (y): 8
1609203	10118SW6	Leptogorgia virgulata (Lamarck, 1815) : Gorgoniidae : Gorgonacea : Anthozoa : Cnidaria	1	Voucher	CES IRN 13036518 : : North Atlantic Ocean : : : : United States : Maryland : : : Boom Wreck, coast of Maryland : Centroid Latitude 38 8 26.0 N : Centroid Longitude 74 57 42.36 W : : Date coll. 01 Oct 2018 : : : : Depth 21 to 24 M : :	Dry	Age reader 1 (y): 5; Age reader 2 (y): 5
1609204	10118SW7	Leptogorgia virgulata (Lamarck, 1815) : Gorgoniidae : Gorgonacea : Anthozoa : Cnidaria	1	Voucher	CES IRN 13036518 : : North Atlantic Ocean : : : : United States : Maryland : : : Boom Wreck, coast of Maryland : Centroid Latitude 38 8 26.0 N : Centroid Longitude 74 57 42.36 W : : Date coll. 01 Oct 2018 : : : : Depth 21 to 24 M : :	Dry	Age reader 1 (y): 6; Age reader 2 (y): 6
1609205	10118SW8	Leptogorgia virgulata (Lamarck, 1815) : Gorgoniidae : Gorgonacea : Anthozoa : Cnidaria	1	Voucher	CES IRN 13036518 : : North Atlantic Ocean : : : : United States : Maryland : : : Boom Wreck, coast of Maryland : Centroid Latitude 38 8 26.0 N : Centroid Longitude 74 57 42.36 W : : Date coll. 01 Oct 2018 : : : : Depth 21 to 24 M : :	Dry	Age reader 1 (y): 5; Age reader 2 (y): 5
1609206	10118SW9	Leptogorgia virgulata (Lamarck, 1815) : Gorgoniidae : Gorgonacea : Anthozoa : Cnidaria	1	Voucher	CES IRN 13036518 : : North Atlantic Ocean : : : : United States : Maryland : : : Boom Wreck, coast of Maryland : Centroid Latitude 38 8 26.0 N : Centroid Longitude 74 57 42.36 W : : Date coll. 01 Oct 2018 : : : : Depth 21 to 24 M : :	Dry	Age reader 1 (y): 7; Age reader 2 (y): 7
1609207	10118SW10	Leptogorgia virgulata (Lamarck, 1815) : Gorgoniidae : Gorgonacea : Anthozoa : Cnidaria	1	Voucher	CES IRN 13036518 : : North Atlantic Ocean : : : : United States : Maryland : : : Boom Wreck, coast of Maryland : Centroid Latitude 38 8 26.0 N : Centroid Longitude 74 57 42.36 W : : Date coll. 01 Oct 2018 : : : : Depth 21 to 24 M : :	Dry	Age reader 1 (y): 8; Age reader 2 (y): 8
1609208	10118SW11	Leptogorgia virgulata (Lamarck, 1815) : Gorgoniidae : Gorgonacea : Anthozoa : Cnidaria	1	Voucher	CES IRN 13036518 : : North Atlantic Ocean : : : : United States : Maryland : : : Boom Wreck, coast of Maryland : Centroid Latitude 38 8 26.0 N : Centroid Longitude 74 57 42.36 W : : Date coll. 01 Oct 2018 : : : : Depth 21 to 24 M : :	Dry	Age reader 1 (y): 7; Age reader 2 (y): 6
1609209	10118SW12	Leptogorgia virgulata (Lamarck, 1815) : Gorgoniidae : Gorgonacea : Anthozoa : Cnidaria	1	Voucher	CES IRN 13036518 : : North Atlantic Ocean : : : : United States : Maryland : : : Boom Wreck, coast of Maryland : Centroid Latitude 38 8 26.0 N : Centroid Longitude 74 57 42.36 W : : Date coll. 01 Oct 2018 : : : : Depth 21 to 24 M : :	Dry	Age reader 1 (y): 8; Age reader 2 (y): 8
1609210	10118SW13	Leptogorgia virgulata (Lamarck, 1815) : Gorgoniidae : Gorgonacea : Anthozoa : Cnidaria	1	Voucher	CES IRN 13036518 : : North Atlantic Ocean : : : : United States : Maryland : : : Boom Wreck, coast of Maryland : Centroid Latitude 38 8 26.0 N : Centroid Longitude 74 57 42.36 W : : Date coll. 01 Oct 2018 : : : : Depth 21 to 24 M : :	Dry	Age reader 1 (y): 9; Age reader 2 (y): 9
1609211	10118SW14	Leptogorgia virgulata (Lamarck, 1815) : Gorgoniidae : Gorgonacea : Anthozoa : Cnidaria	1	Voucher	CES IRN 13036518 : : North Atlantic Ocean : : : : United States : Maryland : : : Boom Wreck, coast of Maryland : Centroid Latitude 38 8 26.0 N : Centroid Longitude 74 57 42.36 W : : Date coll. 01 Oct 2018 : : : : Depth 21 to 24 M : :	Dry	Age reader 1 (y): 9; Age reader 2 (y): 9
1609212	10118SW15	Leptogorgia virgulata (Lamarck, 1815) : Gorgoniidae : Gorgonacea : Anthozoa : Cnidaria	1	Voucher	CES IRN 13036518 : : North Atlantic Ocean : : : : United States : Maryland : : : Boom Wreck, coast of Maryland : Centroid Latitude 38 8 26.0 N : Centroid Longitude 74 57 42.36 W : : Date coll. 01 Oct 2018 : : : : Depth 21 to 24 M : :	Dry	Age reader 1 (y): 7; Age reader 2 (y): 7
1609213	10118SW16	Leptogorgia virgulata (Lamarck, 1815) : Gorgoniidae : Gorgonacea : Anthozoa : Cnidaria	1	Voucher	CES IRN 13036518 : : North Atlantic Ocean : : : : United States : Maryland : : : Boom Wreck, coast of Maryland : Centroid Latitude 38 8 26.0 N : Centroid Longitude 74 57 42.36 W : : Date coll. 01 Oct 2018 : : : : Depth 21 to 24 M : :	Dry	Age reader 1 (y): 10; Age reader 2 (y): 10
1609214	10118SW17	Leptogorgia virgulata (Lamarck, 1815) : Gorgoniidae : Gorgonacea : Anthozoa : Cnidaria	1	Voucher	CES IRN 13036518 : : North Atlantic Ocean : : : : United States : Maryland : : : Boom Wreck, coast of Maryland : Centroid Latitude 38 8 26.0 N : Centroid Longitude 74 57 42.36 W : : Date coll. 01 Oct 2018 : : : : Depth 21 to 24 M : :	Dry	Age reader 1 (y): 7; Age reader 2 (y): 7
1609215	10118SW18	Leptogorgia virgulata (Lamarck, 1815) : Gorgoniidae : Gorgonacea : Anthozoa : Cnidaria	1	Voucher	CES IRN 13036518 : : North Atlantic Ocean : : : : United States : Maryland : : : Boom Wreck, coast of Maryland : Centroid Latitude 38 8 26.0 N : Centroid Longitude 74 57 42.36 W : : Date coll. 01 Oct 2018 : : : : Depth 21 to 24 M : :	Dry	Age reader 1 (y): 7; Age reader 2 (y): 7
1609216	10118SW19	Leptogorgia virgulata (Lamarck, 1815) : Gorgoniidae : Gorgonacea : Anthozoa : Cnidaria	1	Voucher	CES IRN 13036518 : : North Atlantic Ocean : : : : United States : Maryland : : : Boom Wreck, coast of Maryland : Centroid Latitude 38 8 26.0 N : Centroid Longitude 74 57 42.36 W : : Date coll. 01 Oct 2018 : : : : Depth 21 to 24 M : :	Dry	Age reader 1 (y): 7; Age reader 2 (y): 8
1609217	10118SW20	Leptogorgia virgulata (Lamarck, 1815) : Gorgoniidae : Gorgonacea : Anthozoa : Cnidaria	1	Voucher	CES IRN 13036518 : : North Atlantic Ocean : : : : United States : Maryland : : : Boom Wreck, coast of Maryland : Centroid Latitude 38 8 26.0 N : Centroid Longitude 74 57 42.36 W : : Date coll. 01 Oct 2018 : : : : Depth 21 to 24 M : :	Dry	Age reader 1 (y): 6; Age reader 2 (y): 7
1609218	10118SW21	Leptogorgia virgulata (Lamarck, 1815) : Gorgoniidae : Gorgonacea : Anthozoa : Cnidaria	1	Voucher	CES IRN 13036518 : : North Atlantic Ocean : : : : United States : Maryland : : : Boom Wreck, coast of Maryland : Centroid Latitude 38 8 26.0 N : Centroid Longitude 74 57 42.36 W : : Date coll. 01 Oct 2018 : : : : Depth 21 to 24 M : :	Dry	Age reader 1 (y): 7; Age reader 2 (y): 7
1609219	10118SW22	Leptogorgia virgulata (Lamarck, 1815) : Gorgoniidae : Gorgonacea : Anthozoa : Cnidaria	1	Voucher	CES IRN 13036518 : : North Atlantic Ocean : : : : United States : Maryland : : : Boom Wreck, coast of Maryland : Centroid Latitude 38 8 26.0 N : Centroid Longitude 74 57 42.36 W : : Date coll. 01 Oct 2018 : : : : Depth 21 to 24 M : :	Dry	Age reader 1 (y): 6; Age reader 2 (y): 6
1609220	10118SW23	Leptogorgia virgulata (Lamarck, 1815) : Gorgoniidae : Gorgonacea : Anthozoa : Cnidaria	1	Voucher	CES IRN 13036518 : : North Atlantic Ocean : : : : United States : Maryland : : : Boom Wreck, coast of Maryland : Centroid Latitude 38 8 26.0 N : Centroid Longitude 74 57 42.36 W : : Date coll. 01 Oct 2018 : : : : Depth 21 to 24 M : :	Dry	Age reader 1 (y): 12; Age reader 2 (y): 12
1610896	81117SW25	Leptogorgia virgulata (Lamarck, 1815) : Gorgoniidae : Gorgonacea : Anthozoa : Cnidaria	1	Voucher	CES IRN 13036516 : : North Atlantic Ocean : : : : United States : Maryland : : : South Ledges, coast of Maryland : Centroid Latitude 38 9 4 N : Centroid Longitude 74 56 48 W : : Date coll. 11 Aug 2017 : : : : Depth 17 to 21 M : :	Dry	Age reader 1 (y): 11; Age reader 2 (y): 11
